# Supplementary material for: A sigh-performance hydrogen gas sensor based on Ag/Pd nanoparticle-functionalized ZnO nanoplates
Source: Royal Society of Chemistry journal article supplement (doi:10.1039/d3ra01436c), 2023-01-01
Supplement: d3ra01436c1.pdf [file d3ra01436c1.pdf]

## Electronic Supplementary

# High-performance hydrogen gas sensor based on Ag/Pd nanoparticles functionalized ZnO nanoplates

To Thi Nguyet<sup>1</sup>, Dang Thi Thanh Le<sup>1</sup>, Nguyen Van Duy<sup>1</sup>, Chu Thi Xuan<sup>1</sup>, Sven Ingebrandt<sup>2</sup>, Xuan Thang Vu<sup>2</sup>, Nguyen Duc Hoa<sup>1\*</sup>

<sup>1</sup> International Training Institute for Materials Science (ITIMS), Hanoi University of Science and Technology (HUST);

<sup>2</sup> Institute of Materials in Electrical Engineering 1, RWTH Aachen University, Sommerfeldstr. 24, 52074 Aachen, Germany

Corresponding author: Email: [ndhoa@itims.edu.vn](mailto:ndhoa@itims.edu.vn) / [hoa.nguyenduc@hust.edu.vn](mailto:hoa.nguyenduc@hust.edu.vn)

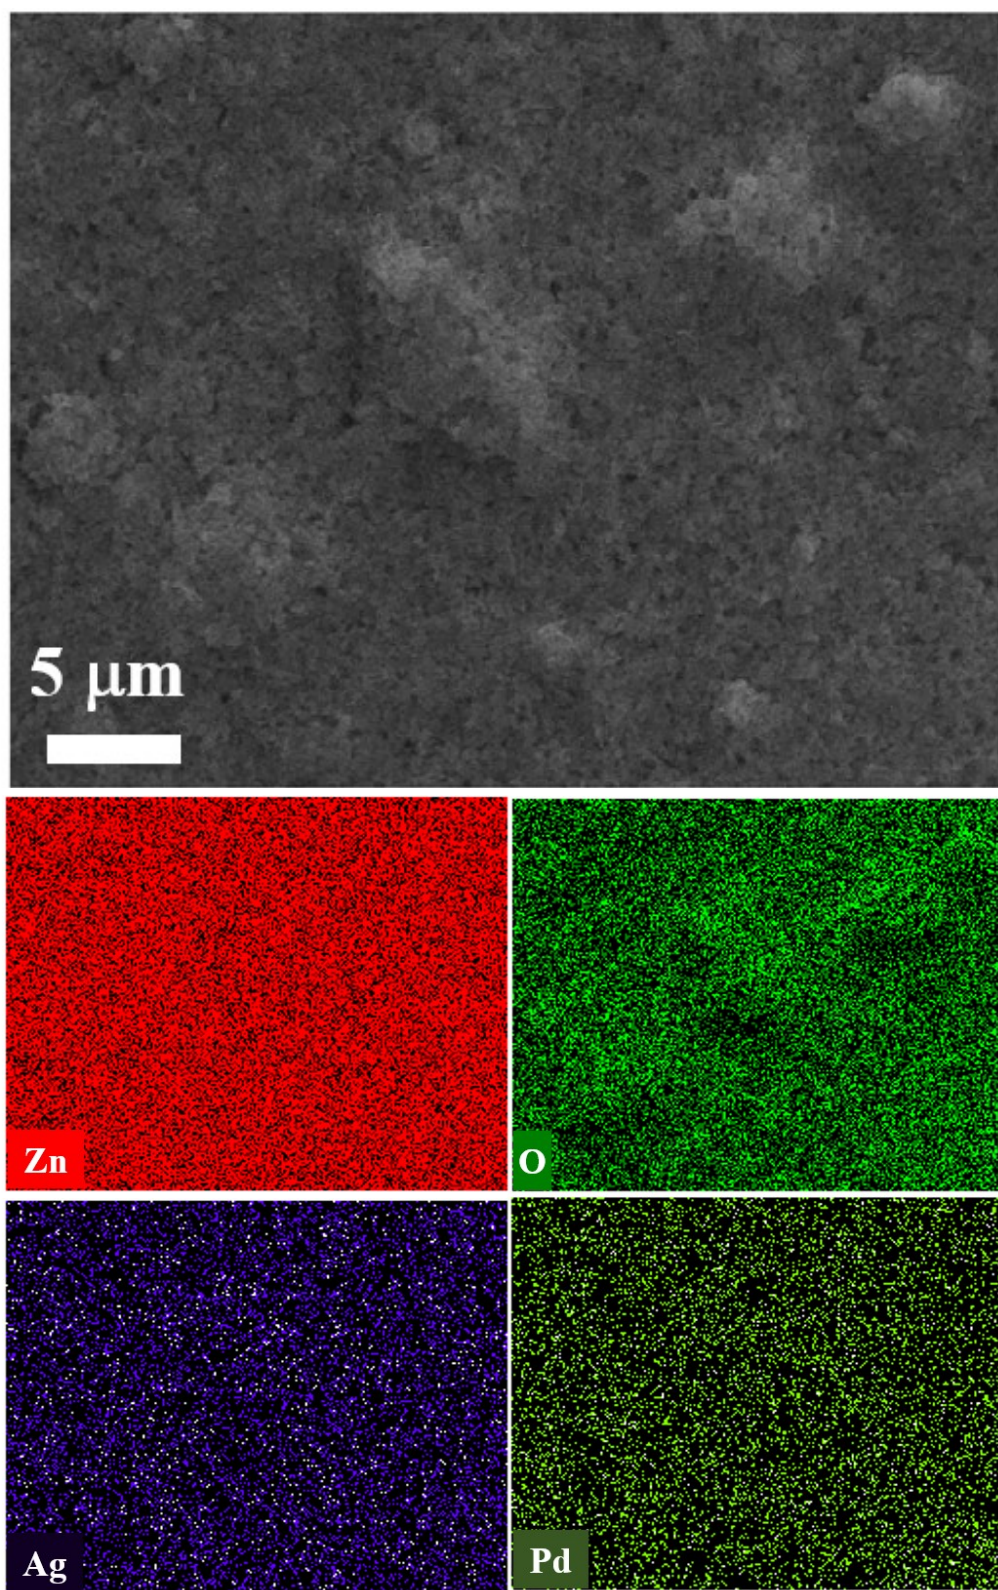

*Figure S1. SEM image, and EDS mapping of the 0.25 wt% Ag/Pd-doped ZnO sample*

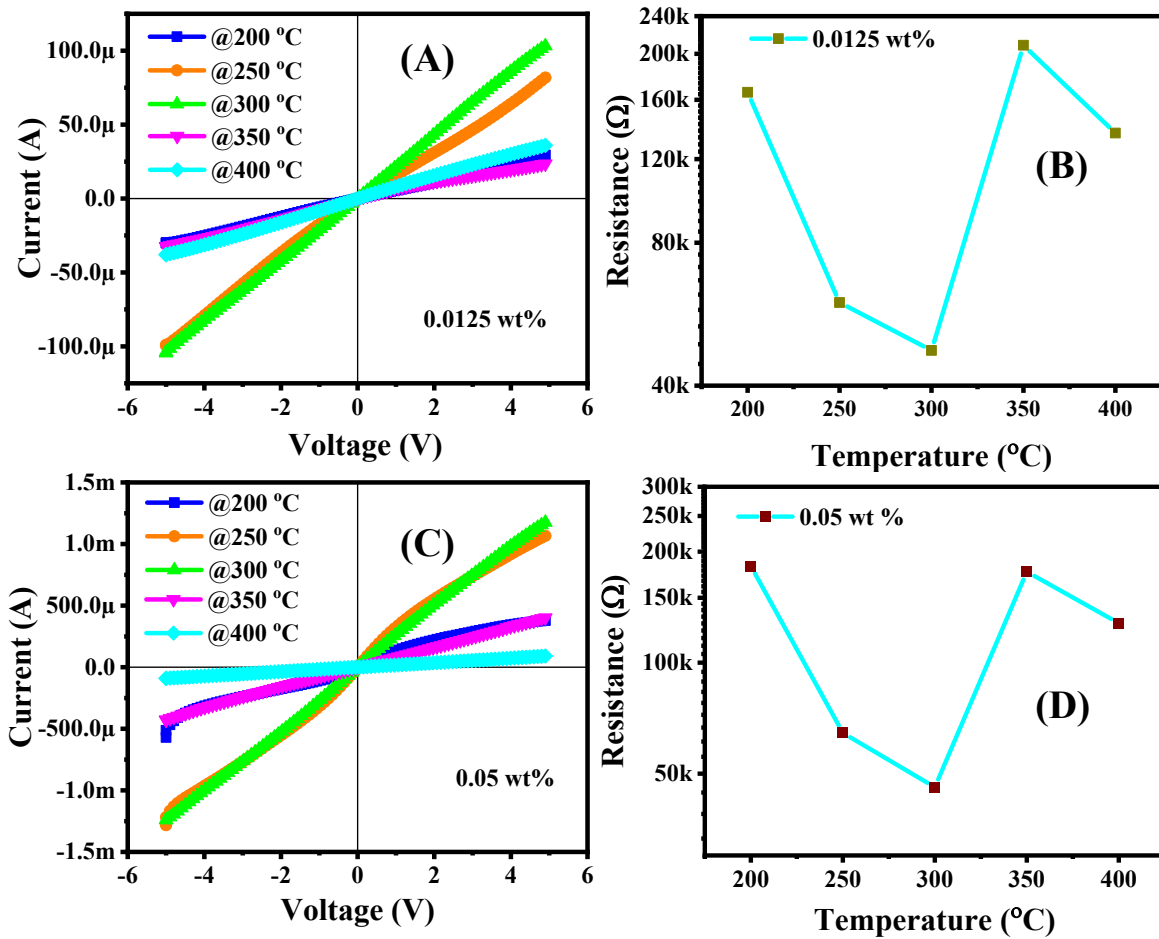

**Figure S2.** The I-V curves and calculated resistance of (A-B) the 0.0125 wt% and 0.05 wt% (C-D) Ag/Pd-doped ZnO measured in the range of 200 – 400  $^{\circ}$ C

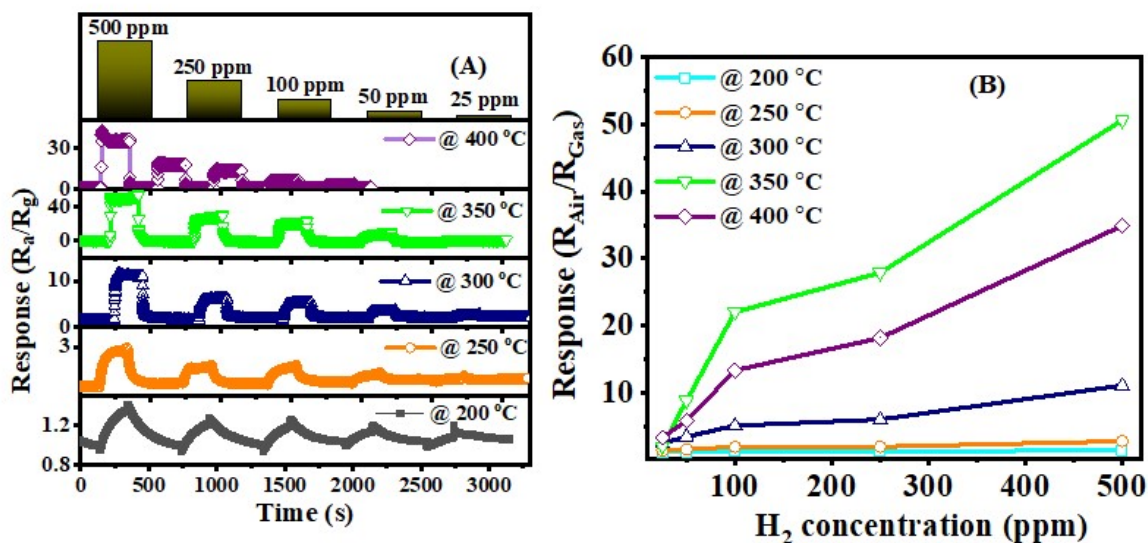

**Figure S3.** (A) The transient response curve of the 0.05 wt% Ag/Pd-ZnO sensor towards different H<sub>2</sub> concentrations in the range 200–400 °C; (B) sensor response as a function of the H<sub>2</sub> concentrations

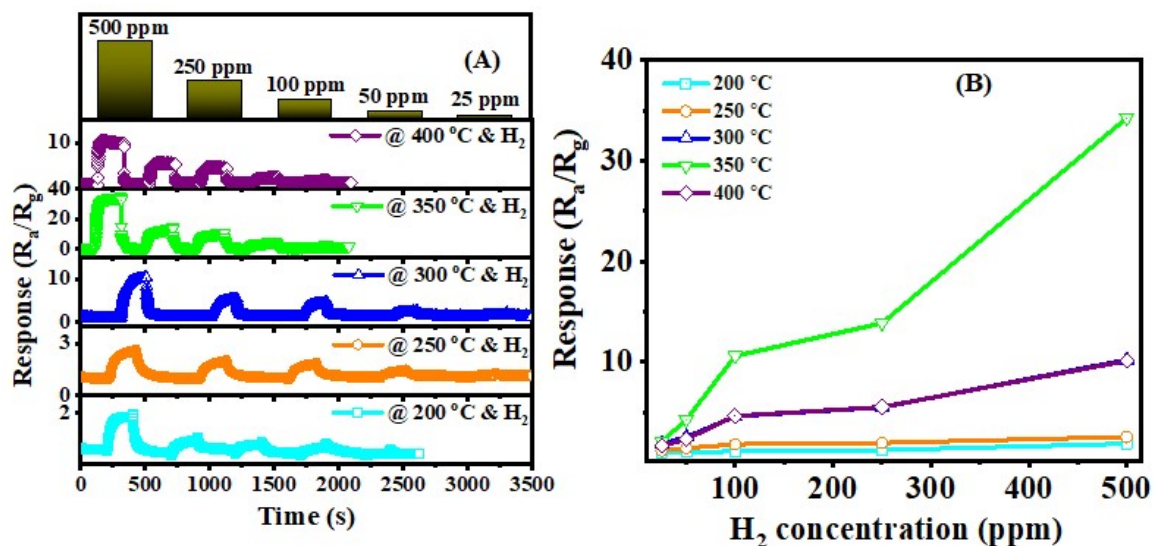

**Figure S4.** (A) Transient response curve of the 0.0125 wt% Ag/Pd-ZnO sensor toward different H<sub>2</sub> concentrations in the temperature range of 200–400 °C; (B) sensor response as a function of the H<sub>2</sub> concentration

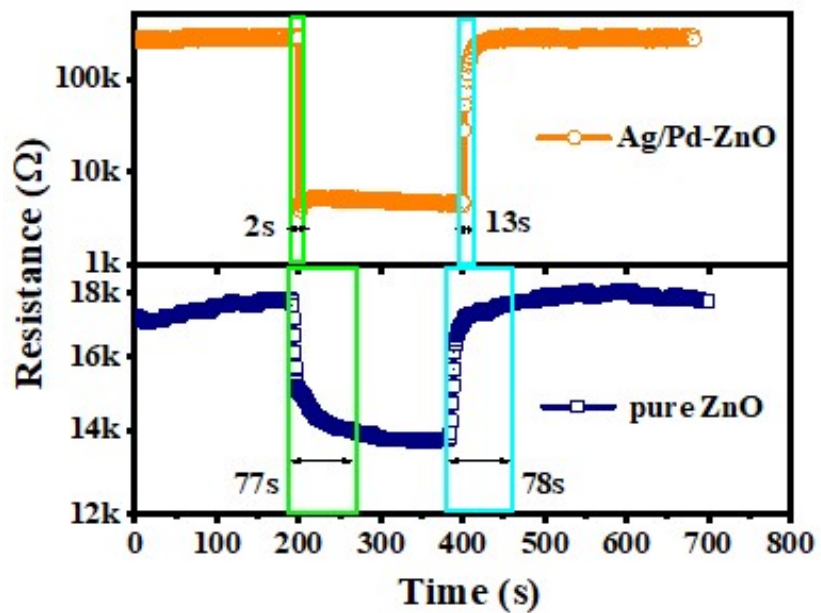

*Figure S5. Comparison in the dynamic response of pure ZnO and 0.25 wt% Ag/Pd-ZnO sensor toward 400 °C*

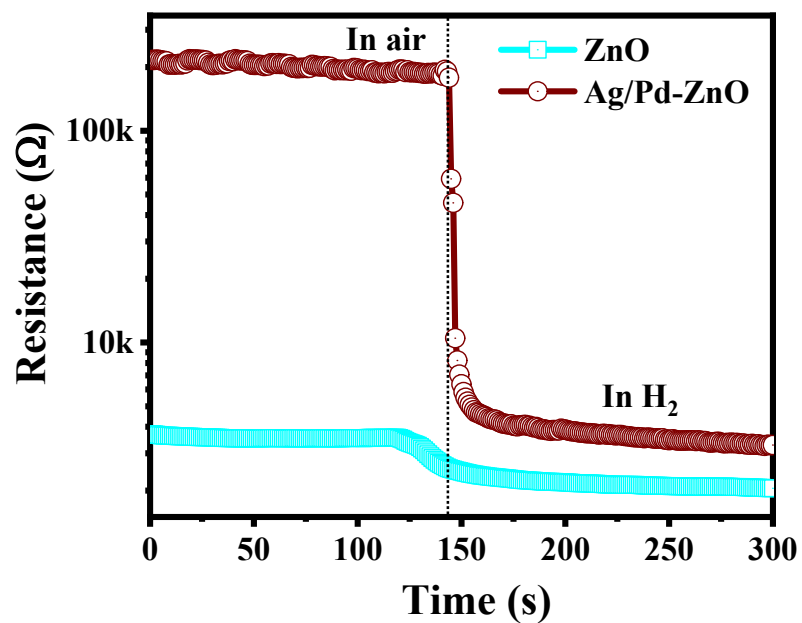

**Figure S6.** The resistance curve of the pristine ZnO and 0.25 wt% Ag/Pd-doped ZnO sensor in air and H<sub>2</sub> gas at 400°C
